# Supplementary material for: Effect of substitution on second-order nonlinear optical properties of ferrocene appended donor–π–acceptor Y-shaped trifluoromethyl imidazole chromophores
Source: Royal Society of Chemistry journal article supplement (doi:10.1039/d4nj02079k), 2024-01-01

**Effect of Substitution on Second-order Nonlinear Optical Properties in  
Ferrocene Appended Donor- $\pi$ -Acceptor Y-shaped Trifluoromethyl Imidazole  
Chromophores**

Selvam Prabu<sup>a</sup>, Francesco Fagnani<sup>b\*</sup>, Alessia Colombo<sup>b</sup>, Claudia Dragonetti<sup>b</sup>, Dominique  
Roberto<sup>b</sup>, Logesh Mathivathanan<sup>a</sup>, Nallasamy Palanisami<sup>a\*</sup>

<sup>a</sup>Centre for Functional Materials, Department of Chemistry, School of Advanced Sciences,  
Vellore Institute of Technology, Vellore-632014, Tamil Nadu, India.

<sup>b</sup>Dipartimento di Chimica, Università degli Studi di Milano, Via Golgi, 19, I-20133; Milano,  
Italy.

Corresponding author: E-mail: palanisami.n@gmail.com, [palanisami.n@vit.ac.in](mailto:palanisami.n@vit.ac.in);  
francesco.fagnani@unimi.it

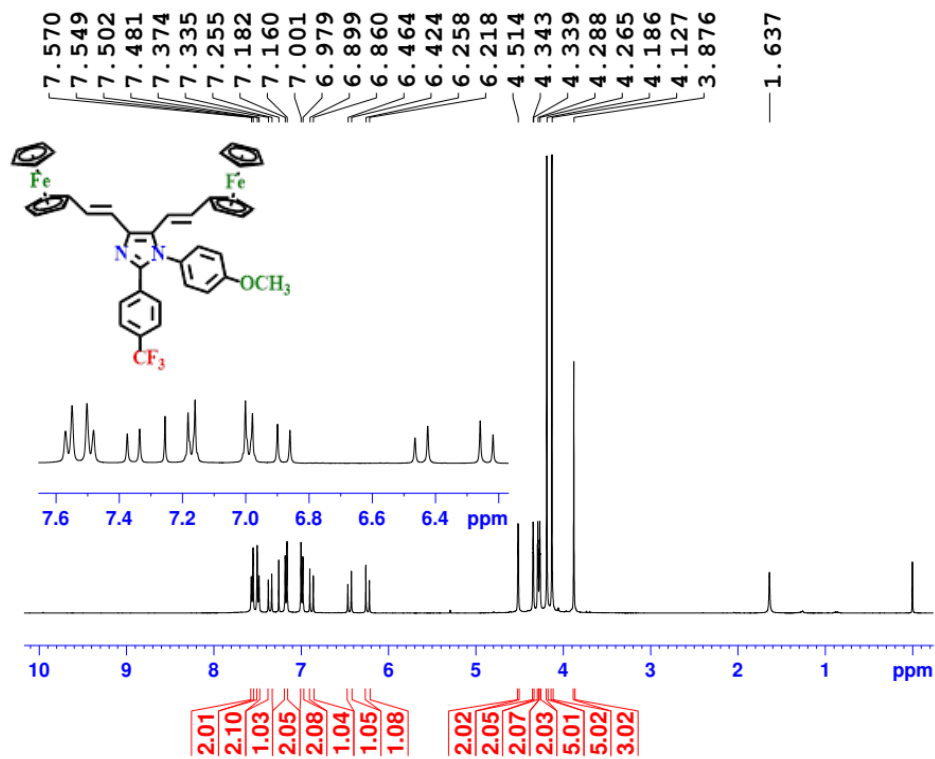

**Figure S1.** <sup>1</sup>H NMR spectrum of chromophore **1** in CDCl<sub>3</sub> at 25 °C

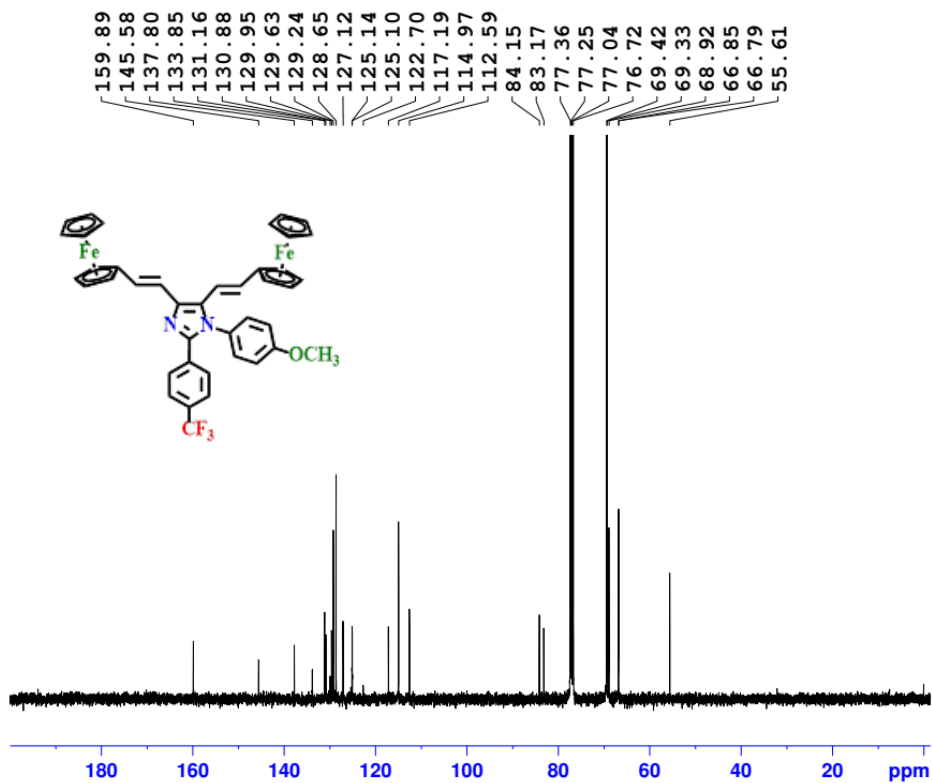

**Figure S2.** <sup>13</sup>C NMR spectrum of chromophore **1** in CDCl<sub>3</sub> at 25 °C

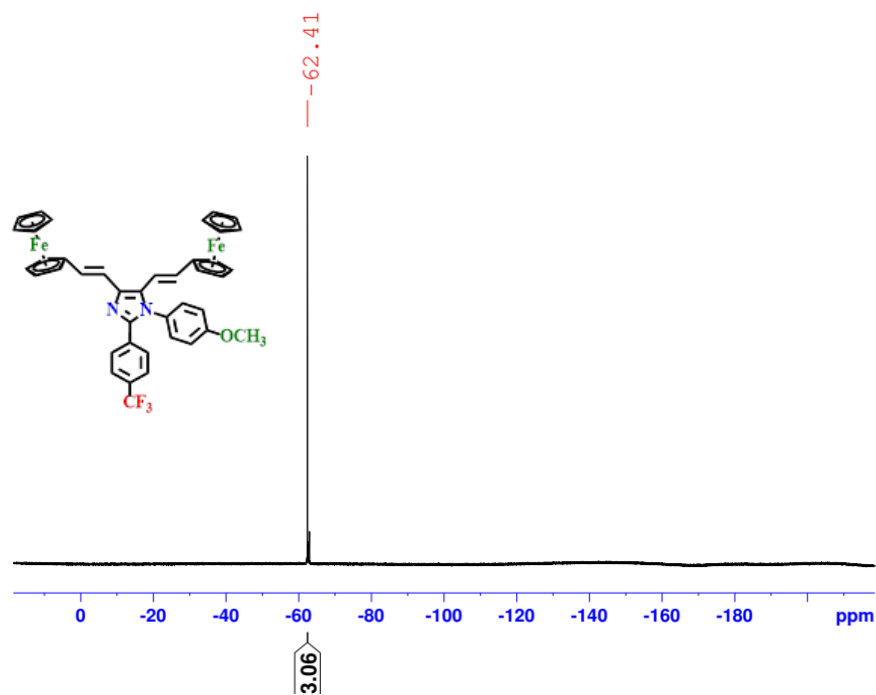

**Figure S3.**  $^{19}\text{F}$  NMR spectrum of chromophore 1 in  $\text{CDCl}_3$  at  $25^\circ\text{C}$

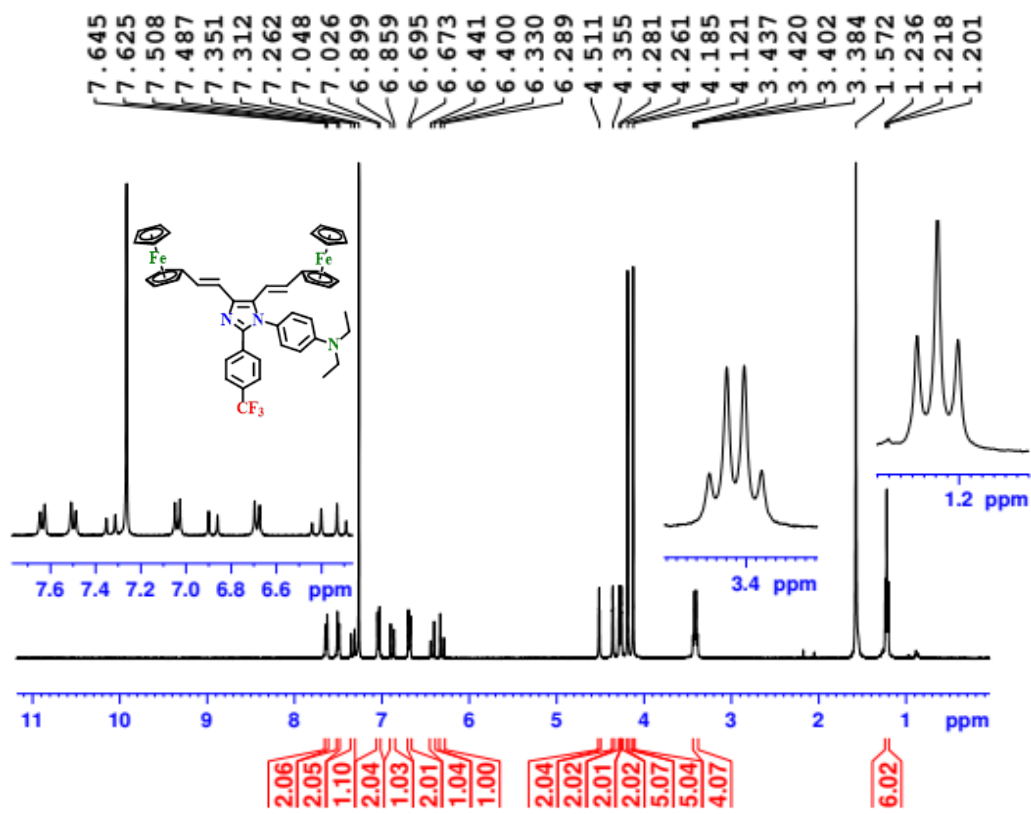

**Figure S4.**  $^1\text{H}$  NMR spectrum of chromophore 2 in  $\text{CDCl}_3$  at  $25^\circ\text{C}$

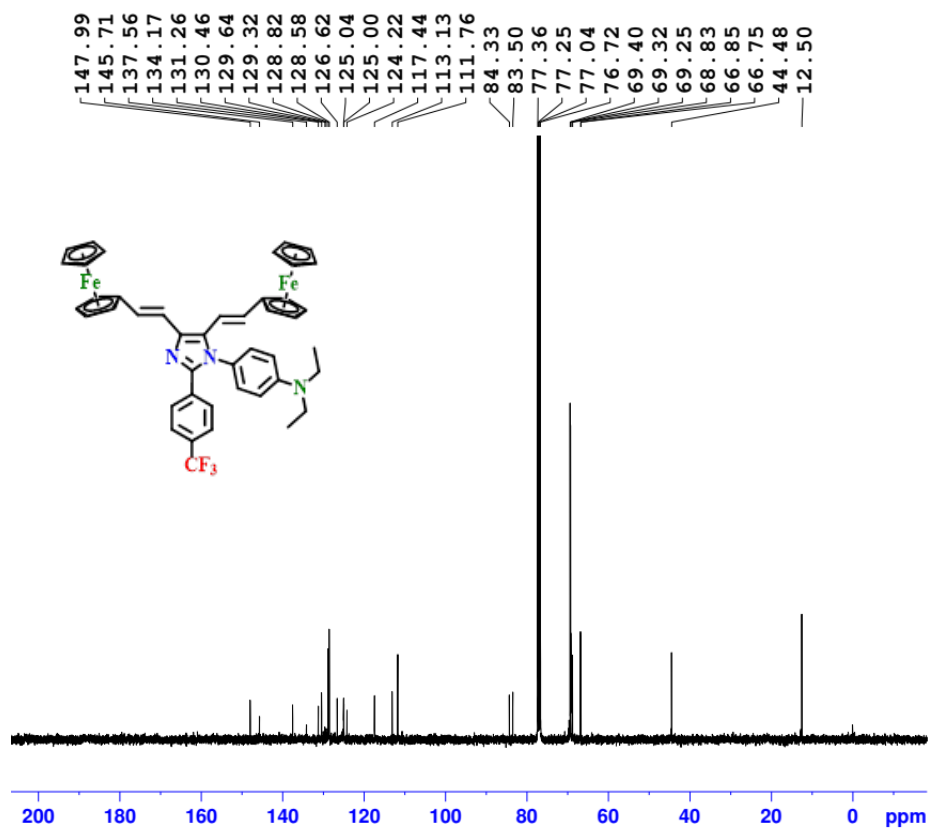

**Figure S5.** <sup>13</sup>C NMR spectrum of chromophore **2** in CDCl<sub>3</sub> at 25 °C

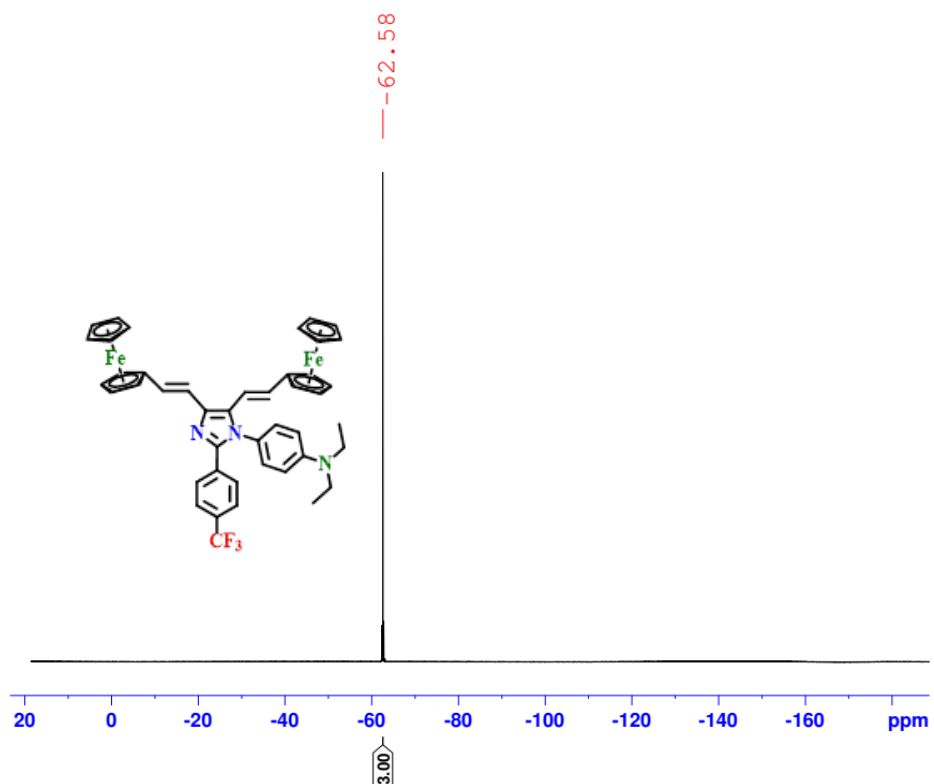

**Figure S6.** <sup>19</sup>F NMR spectrum of chromophore **2** in CDCl<sub>3</sub> at 25 °C

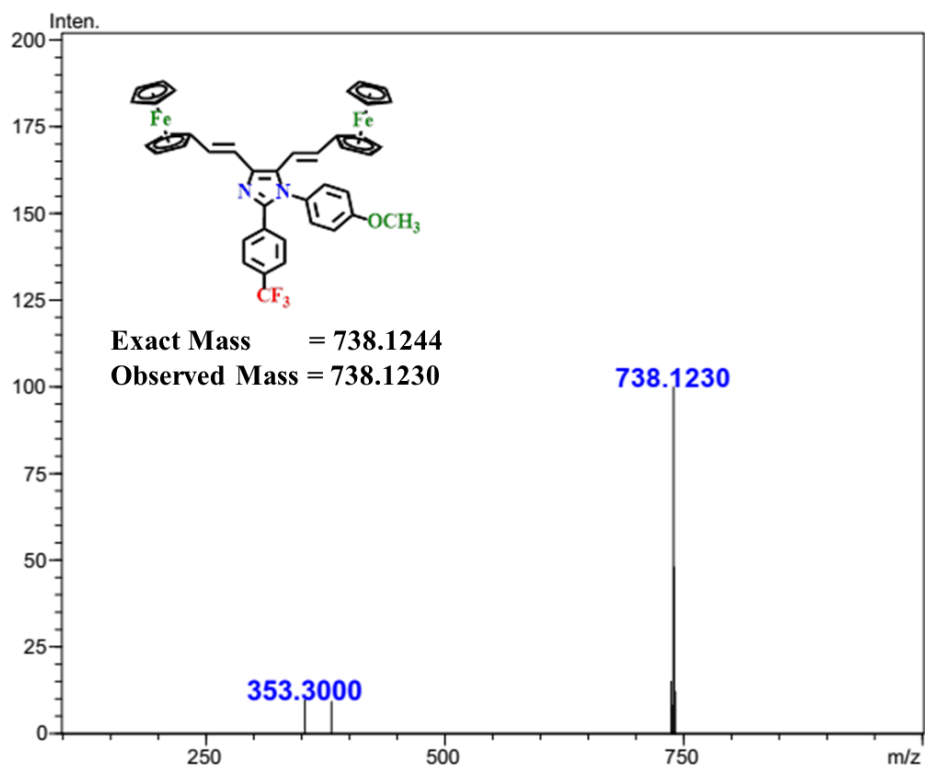

Figure S7. ESI-Mass spectrum of the chromophore 1.

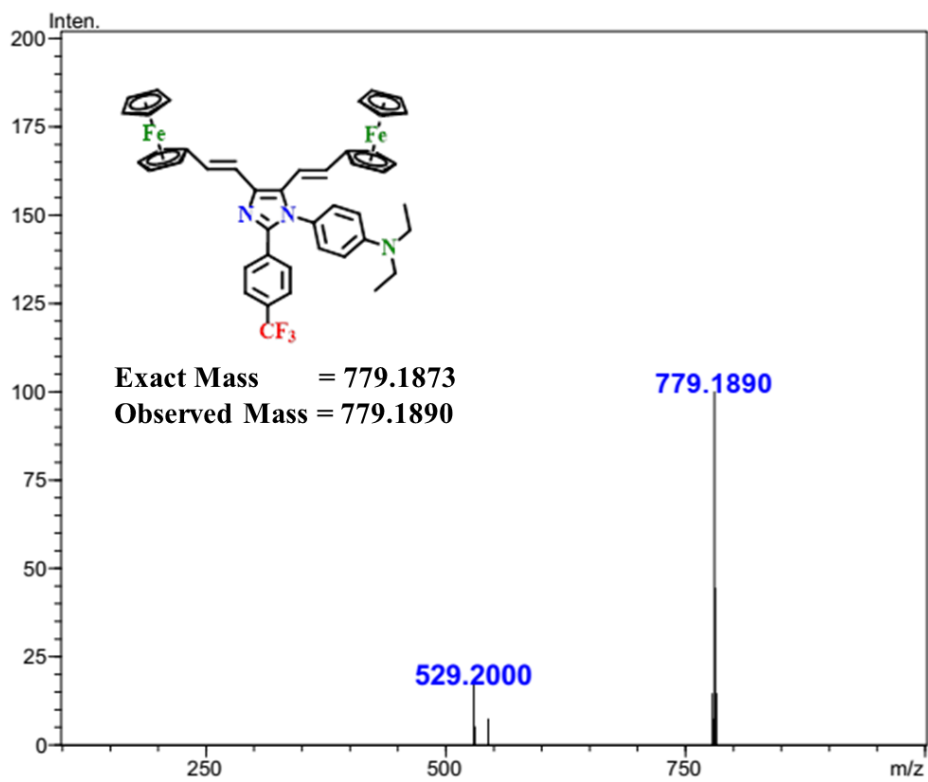

Figure S8. ESI-Mass spectrum of the chromophore 2.

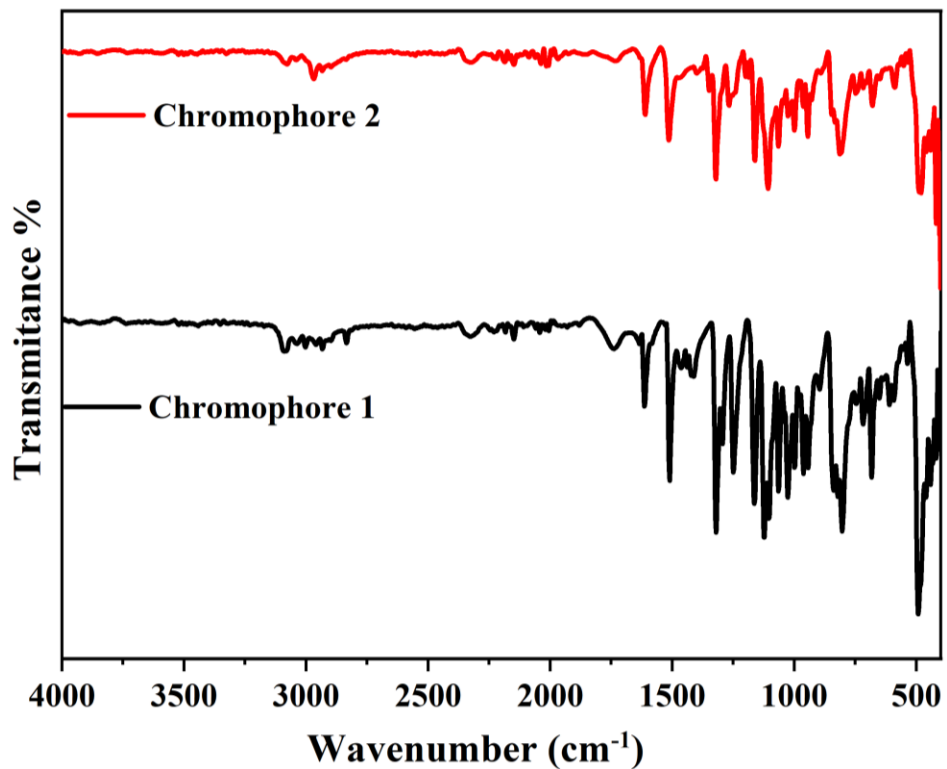

Figure S9. FT-IR spectra of chromophores 1 and 2.

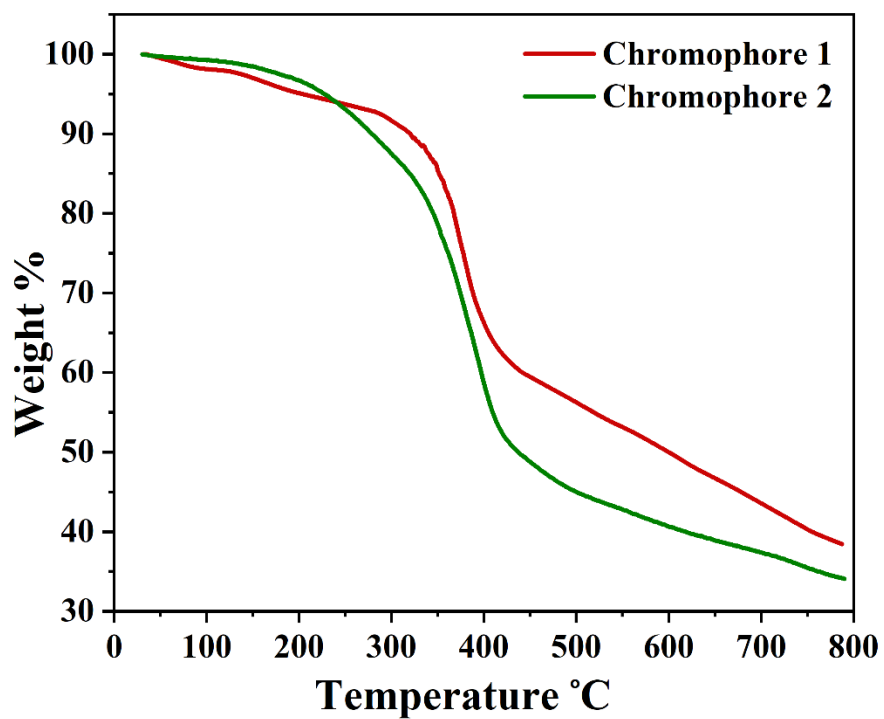

Figure S10. TGA curve of the chromophores 1 and 2.

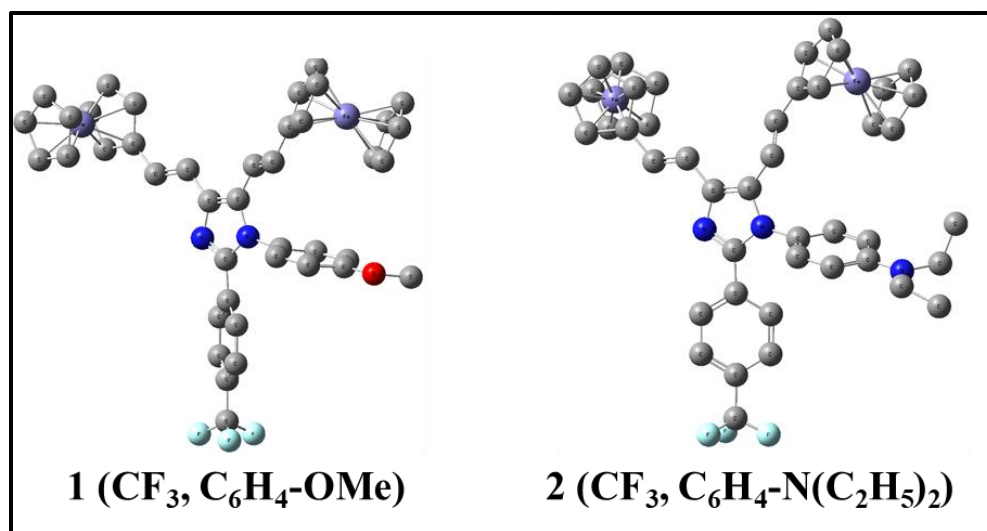

**Figure S11.** The optimized geometries of chromophores **1** and **2** obtained at B3LYP/6-31+G\*\* level of theory

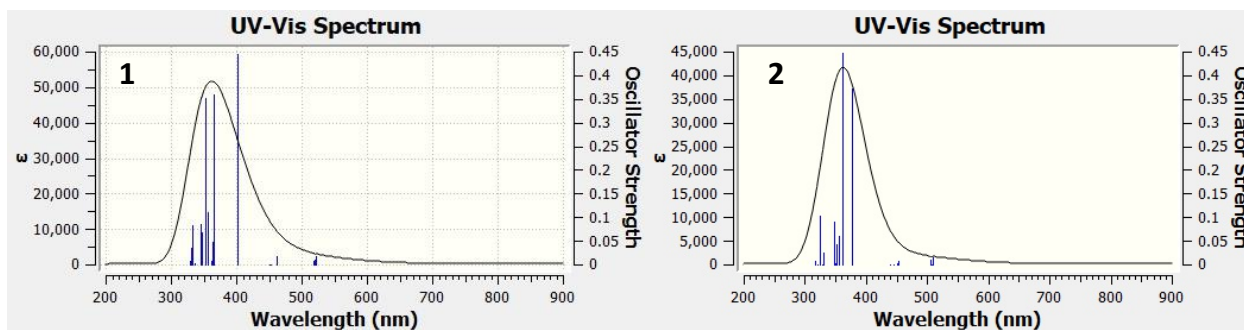

**Figure S12.** Theoretically calculated absorption spectra for the chromophores **1** and **2** with  $\text{CHCl}_3$  solvent. The absorption spectra were obtained by TD-DFT calculation with B3LYP/6-31+G\*\* level of theory. The spectra were visualized in Gauss View 6.1.

**Table S1.** Crystal data and structure refinement parameters for chromophores **1** and **2**.

| Identification code                           | Chromophore 1                                                                                                                         | Chromophore 2                                                                                                        |
|-----------------------------------------------|---------------------------------------------------------------------------------------------------------------------------------------|----------------------------------------------------------------------------------------------------------------------|
| CCDC                                          | 1920307                                                                                                                               | 1903164                                                                                                              |
| Empirical formula                             | C <sub>41</sub> H <sub>33</sub> F <sub>3</sub> Fe <sub>2</sub> N <sub>2</sub> O                                                       | C <sub>44</sub> H <sub>40</sub> F <sub>3</sub> Fe <sub>2</sub> N <sub>3</sub>                                        |
| Formula weight                                | 738.39                                                                                                                                | 779.49                                                                                                               |
| Temperature, K                                | 296 (2)                                                                                                                               | 296 (2)                                                                                                              |
| Wavelength, Å                                 | 0.71073                                                                                                                               | 0.71073                                                                                                              |
| Crystal System                                | Triclinic                                                                                                                             | Monoclinic                                                                                                           |
| Space group                                   | P -1                                                                                                                                  | P2 <sub>1</sub> /c                                                                                                   |
| Unit cell dimensions                          | a = 11.0840(13) Å<br>b = 12.6976(19) Å<br>c = 12.9135(18) Å<br>$\alpha$ = 80.552(6)°<br>$\beta$ = 76.974(5)°<br>$\gamma$ = 79.651(6)° | a = 16.097(2) Å<br>b = 22.892(4) Å<br>c = 10.3035(13) Å<br>$\alpha$ = 90°<br>$\beta$ = 101.194(5)°<br>$\gamma$ = 90° |
| Volume                                        | 1727.3(4) Å <sup>3</sup>                                                                                                              | 3724.6(10) Å <sup>3</sup>                                                                                            |
| Z                                             | 2                                                                                                                                     | 4                                                                                                                    |
| Calculated density (Mg/m <sup>3</sup> )       | 1.420                                                                                                                                 | 1.390                                                                                                                |
| Absorption coefficient (mm <sup>-1</sup> )    | 0.891                                                                                                                                 | 0.829                                                                                                                |
| F (000)                                       | 760                                                                                                                                   | 1616                                                                                                                 |
| Crystal size (mm <sup>3</sup> )               | 0.300 x 0.200 x 0.200                                                                                                                 | 0.350 x 0.350 x 0.300                                                                                                |
| Theta range for data collection (°)           | 2.25 to 28.28                                                                                                                         | 1.57 to 23.00                                                                                                        |
| Reflections collected                         | 14137                                                                                                                                 | 30387                                                                                                                |
| Completeness to theta = 25.242                | 99.1%                                                                                                                                 | 99.9 %                                                                                                               |
| Max. and min. transmission                    | 0.842 and 0.776                                                                                                                       | 0.789 and 0.760                                                                                                      |
| Goodness-of-fit on F <sup>2</sup>             | 1.0459                                                                                                                                | 1.0685                                                                                                               |
| Refinement method                             | Full-matrix least-squares on F <sup>2</sup>                                                                                           | Full-matrix least-squares on F <sup>2</sup>                                                                          |
| Final R indices [ <i>I</i> > 2σ ( <i>I</i> )] | R <sub>1</sub> = 0.0423, wR <sub>2</sub> = 0.1016                                                                                     | R <sub>1</sub> = 0.0546, wR <sub>2</sub> = 0.2008                                                                    |
| R indices (all data)                          | R <sub>1</sub> = 0.0755, wR <sub>2</sub> = 0.1211                                                                                     | R <sub>1</sub> = 0.0924, wR <sub>2</sub> = 0.1164                                                                    |



**Table S2.** Structural parameters for chromophores **1** and **2**

|                                                                         | <b>1</b> | <b>2</b> |
|-------------------------------------------------------------------------|----------|----------|
| Average Fe1-C                                                           | 2.021    | 2.050    |
| Average Fe1-C                                                           | 2.091    | 2.044    |
| Fe1-Cent(1)                                                             | 1.640    | 1.644    |
| Fe1-Cent(2)                                                             | 1.654    | 1.639    |
| Cent(1)-Fe(1)-Cent(2)                                                   | 176.998  | 177.060  |
| Average Fe2-C                                                           | 2.064    | 2.032    |
| Average Fe2-C                                                           | 2.051    | 2.029    |
| Fe2-Cent(1)                                                             | 1.687    | 1.625    |
| Fe2-Cent(2)                                                             | 1.647    | 1.636    |
| Cent(1)-Fe(2)-Cent(2)                                                   | 177.866  | 176.165  |
| C-F                                                                     | 1.191(5) | 1.267(8) |
| O-C                                                                     | 1.429(5) | -        |
| C-O-C                                                                   | 118.2(3) | -        |
| C-N1-C                                                                  | 106.5(2) | 106.3(4) |
| C-N2-C                                                                  | 106.7(2) | 106.5(4) |
| C-C-C                                                                   | 123.7(3) | 125.7(5) |
| C-C-C                                                                   | 129.6(3) | 125.3(5) |
| The interatomic distances are reported in angstroms (Å); angles are (°) |          |          |

**Table S3.** Selected torsion or dihedral ( $\varphi$ ) angles of the chromophores **1** and **2**.

| Chromophore <b>1</b> |            | Chromophore <b>2</b> |            |
|----------------------|------------|----------------------|------------|
| Atoms                | Angles (°) | Atoms                | Angles (°) |
| C19-C18-C17-C16      | -177.933   | C8-C11-C12-C13       | 176.522    |
| C29-C30-C31-C32      | 177.523    | N1-C33-C34-C35       | 148.919    |
| N1-C8-C5-C6          | -147.398   | N2-C33-C34-C39       | 149.866    |
| N2-C8-C5-C4          | -148.868   | -                    | -          |

**Table S4.** Selected transitions obtained from TD-DFT calculation with B3LYP/6-31+G\*\* level theory.

| Entry                                                                              | $\lambda$<br>(nm) | Oscillator<br>strength, $f$ | Energy<br>(eV) | Selected Major Transitions <sup>a</sup> |
|------------------------------------------------------------------------------------|-------------------|-----------------------------|----------------|-----------------------------------------|
| <b>1</b><br>(CF <sub>3</sub> , C <sub>6</sub> H <sub>4</sub> -OMe)                 | 369               | 0.7363                      | 3.35           | H → L (67%)                             |
|                                                                                    | 406               | 0.5596                      | 3.04           | H → L (91%)                             |
|                                                                                    | 357               | 0.1784                      | 3.47           | H-5 → L+6 (18%), H-1 → L+2 (13%)        |
|                                                                                    | 346               | 0.0626                      | 3.57           | H-1 → L (75%)                           |
|                                                                                    | 332               | 0.0546                      | 3.73           | H-4 → L (63%)                           |
|                                                                                    | 344               | 0.0378                      | 3.59           | H-2 → L (78%)                           |
|                                                                                    | 329               | 0.0330                      | 3.75           | H → L+2 (69%)                           |
|                                                                                    | 364               | 0.0220                      | 3.40           | H-3 → L (36%)                           |
| <b>2</b><br>(CF <sub>3</sub> , C <sub>6</sub> H <sub>4</sub> -N(Et) <sub>2</sub> ) | 361               | 0.4032                      | 3.42           | H → L+1 (67%)                           |
|                                                                                    | 377               | 0.3423                      | 3.28           | H → L (92%)                             |
|                                                                                    | 358               | 0.1485                      | 3.46           | H-1 → L (76%)                           |
|                                                                                    | 347               | 0.1030                      | 3.56           | H-2 → L+6 (12%)                         |
|                                                                                    | 352               | 0.0220                      | 3.52           | H-5 → L+6 (18%), H-2 → L+1 (19%)        |
|                                                                                    | 353               | 0.0099                      | 3.50           | H-1 → L (13%)                           |
|                                                                                    | 504               | 0.0096                      | 2.45           | H-2 → L+7 (29%)                         |

<sup>a</sup>H = HOMO; L = LUMO; only contributions above 10% are included.

**Table S5.** Density surfaces of the frontier orbitals involved in electronic transitions of chromophores **1** and **2** which is derived from B3LYP/6-31+G\*\* level of theory using isosurface value of 0.02 au.

| Orbitals | 1                                                                                   | 2                                                                                    |
|----------|-------------------------------------------------------------------------------------|--------------------------------------------------------------------------------------|
| HOMO-4   | 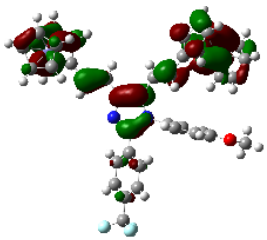   |    |
| HOMO-3   |    |   |
| HOMO-2   |  |  |
| HOMO-1   |  |  |

|               |                                                                                     |                                                                                      |
|---------------|-------------------------------------------------------------------------------------|--------------------------------------------------------------------------------------|
| <b>HOMO</b>   | 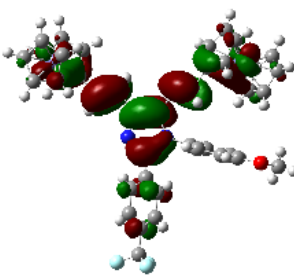   |    |
| <b>LUMO</b>   |    |    |
| <b>LUMO+1</b> |  |  |
| <b>LUMO+2</b> |  |  |

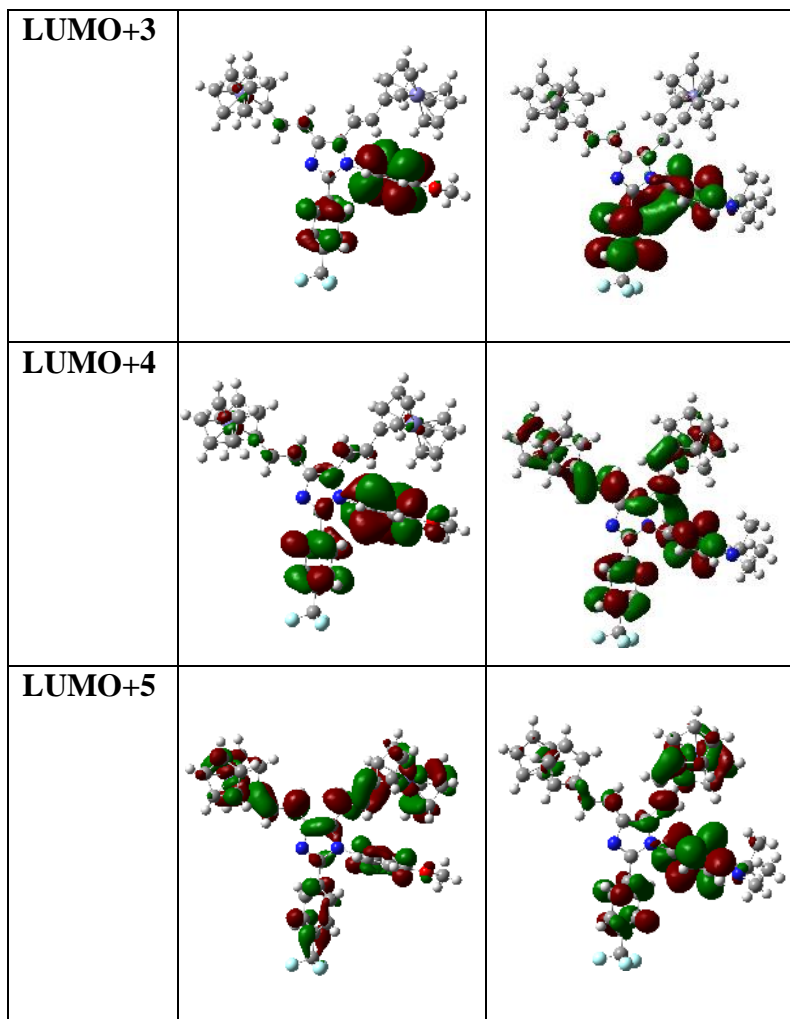

Supplement: d4nj02079k1.pdf [file d4nj02079k1.pdf]
